# Supplementary material
Source: PubMed Central journal article supplement (PMC3948463)
Supplement: ct400514p_si_001.pdf [file ct400514p_si_001.pdf]

## Supplemental Figure 1

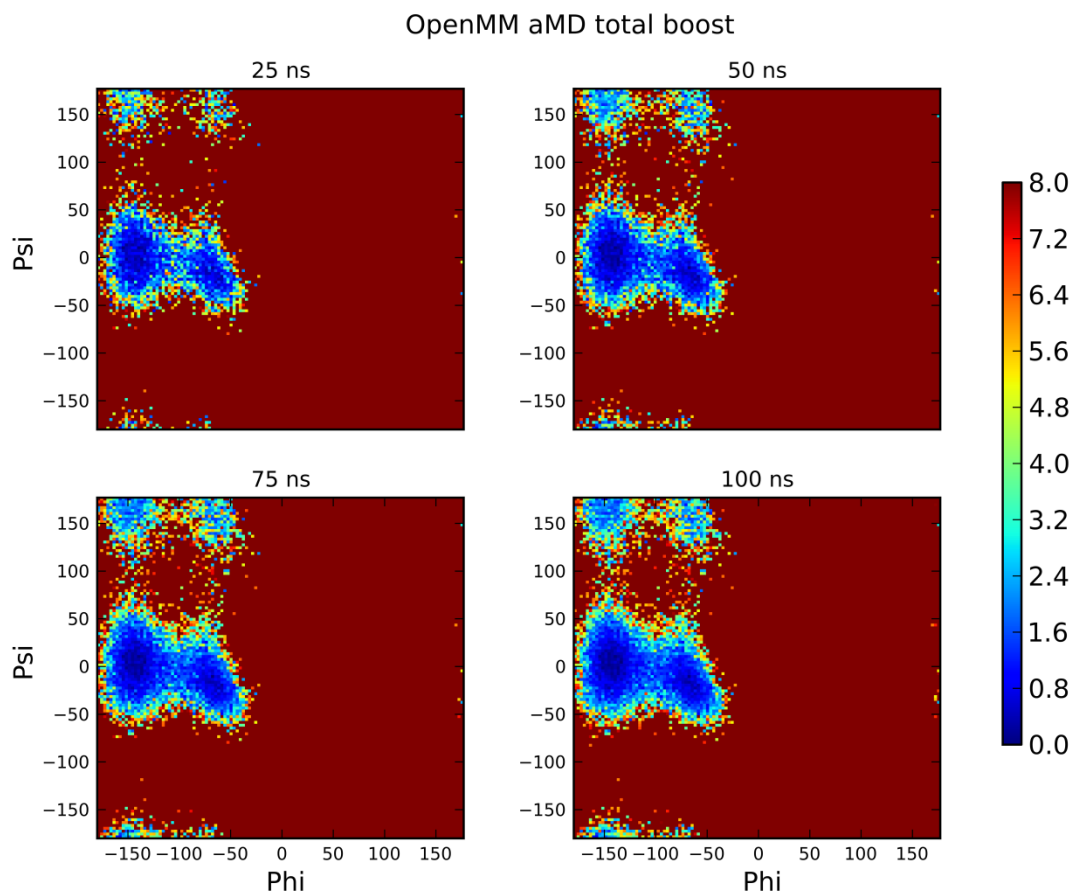

Supplemental Figure 1. Reweighted Phi-Psi free energy maps (in kcal/mol) for alanine dipeptide calculated from total energy boost aMD simulations of length A) 25 ns, B) 50 ns, C) 75 ns, and D) 100 ns.

## Supplemental Figure 2

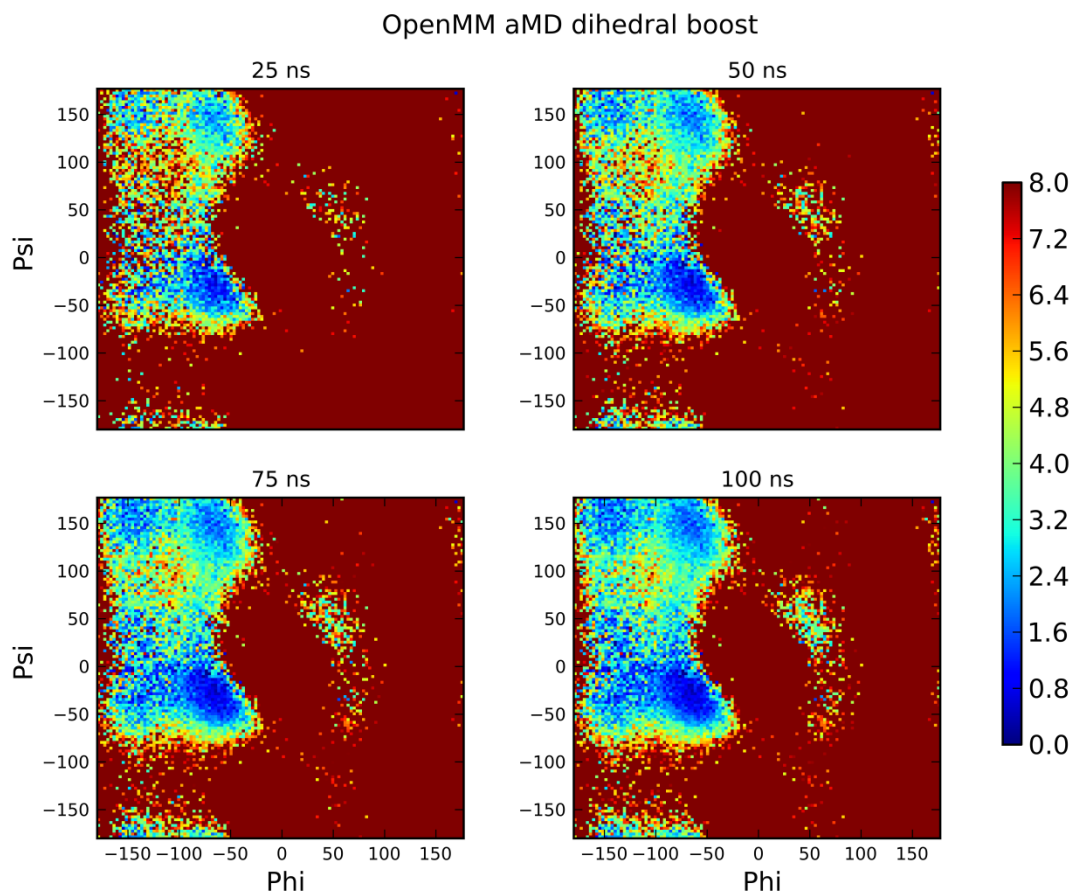

Supplemental Figure 2. Reweighted Phi-Psi free energy maps (in kcal/mol) for alanine dipeptide calculated from dihedral energy boost aMD simulations of length A) 25 ns, B) 50 ns, C) 75 ns, and D) 100 ns.
